# Supplementary material for: The Effect of Primary Care Visits on Total Patient Care Cost: Evidence From the Veterans Health Administration
Source: PubMed Central journal article supplement — J Prim Care Community Health. 2022 Dec 23;13:21501319221141792. doi: 10.1177/21501319221141792 (PMC9793026; doi:10.1177/21501319221141792), 2022-12-23
Supplement: sj-pdf-1-jpc-10.1177_21501319221141792.pdf [file sj-pdf-1-jpc-10.1177_21501319221141792.pdf]

# **The Effect of Primary Care Visits on Total Patient Care Cost**

## **Evidence from the Veterans Health Administration**

### **Supplemental Materials**

Jian Gao, PhD, Eileen Moran, MS, Rachel Grimm, MD,

Andrew Toporek, BS, Christopher Ruser, MD

### **Table of Contents**

- 1. Statistical Modeling – Page 2**
  - 1.1. Outcome Transformation and Generalized Linear Models (GLM) – Page 2
  - 1.2. Endogeneity –Page 3
  
- 2. Sensitivity Analyses – Page 4**
  - 2.1. Inclusion of Medicare Expenditures – Page 3
  - 2.2. Fixed vs. Random Effect Model – Page 4
  - 2.3. Alternative Risk Adjustments – Page 4
  - 2.4. Additional Sensitivity Analyses – Page 6
  
- 3. References – Page 7**
  
- 4. S-Tables**
  - s-Table 1 – Page 8
  - s-Table 2 – Page 12
  - s-Table 3 – Page 13
  - s-Table 4 – Page 14
  - s-Table 5 – Page 17
  - s-Table 6 – Page 18
  - s-Table 7 – Page 19
  - s-Table 8 – Page 20

# 1. Statistical Modeling

## 1.1. Outcome Transformation and Generalized Linear Models (GLM)

In healthcare cost analyses, model specification plays a vital role. It has been widely, but mistakenly, believed that linear regression is valid only when the outcome (i.e., dependent variable) is normally distributed. As a result, the dependent variable is often log or square-root transformed to achieve a normal distribution.<sup>1</sup>

Fitting linear regression does not require normality of the dependent variable, although estimating the standard errors and testing statistical significance of the coefficients do when the sample size is small. However, when the sample size is large, the latter does not require normality either. This is because the Central Limit Theorem (CLT) guarantees the normal distribution of the coefficient estimators which are the weighted average of the dependent variable.<sup>2</sup> In fact, based on their simulation analyses, Lumley and colleagues concluded that “These results suggest that cost data can be analyzed using least-squares approaches with samples of 500 and more.” Most importantly, for large samples, not only is the outcome transformation for normality not needed but can also result in severe bias of the coefficient estimates.<sup>2-6</sup>

Generalized Linear Models (GLM) have also been proposed for analyzing right-skewed data, especially the Gamma model with the log link for cost analyses. However, as Manning and Mullahy noted in describing log transformation in their 2001 landmark paper,<sup>1</sup> “When she was good, she was very, very good. But when she was bad, she was horrid!” We fitted the Gamma model with the log link and compared its model fit statistics to those of the multivariate linear model:

| Model                     | MAPE  | MAE          |
|---------------------------|-------|--------------|
| Multivariate Linear Model | 1.5   | 6,723.2      |
| GLM (Gamma with Log Link) | 315.5 | 34,879,057.5 |

Here, MAPE (mean absolute percentage error) =  $\frac{1}{N} \sum_{n=1}^N \left| \frac{\text{observed value} - \text{predicted value}}{\text{observed value}} \right|$ , and

MAE (mean absolute error) =  $\frac{1}{N} \sum_{n=1}^N |\text{observed value} - \text{predicted value}|$ .

Further examination of the errors revealed that the Gamma model grossly overpredicted the cost. We contacted the statistical team at SAS and shared our SAS codes and results to rule out any syntax errors. A senior statistician informed us that the gamma model did not fit our data, which confirmed our conclusion.

Taken together, these assessments led us to choose to use multivariate linear regression modeling to adjust for confounding variables. Of special note, the signs of the confounder coefficient estimates may not be intuitive. For instance, the variable “age” has a negative coefficient, but it must be interpreted with the age categories together because of its non-linear effect and multicollinearity. For the aim of this study, what matters is how inclusion/exclusion of age or age groups affects the estimate of the treatment effect. Our sensitivity analyses showed the treatment effects from including age only, age groups only, or both are nearly identical (-721.8, -720.3, and -721.2, respectively). In addition, the large negative intercept (-22,208) reported in Table 3 is not a sign of model misspecification but a result of the CPM risk score scaling which was centered on 100. If the risk score were centered on zero, the intercept would be a large positive number, 17,261; and if the risk scores were scaled to have a minimum value of zero, then the intercept would be 831.

## **1.2. Endogeneity**

Endogeneity arises when a regressor is correlated with the error term in the regression, which results in inconsistent or biased estimates. Endogeneity can result under the following circumstances: (1) Errors-in-variables, (2) simultaneous causality, and (3) omitted variables. In the VHA system, clinical encounters such as outpatient visits and inpatient admissions are recorded into centralized databases with few errors -- each encounter is recorded with service date and provider IDs; and the accuracy of the encounters is routinely audited by local Compliance Offices and external stakeholders such as the Office of the Inspector General (OIG). It is possible but unlikely changes of costs drive changes of PC visits – the number of PC providers in the VHA system is rather fixed and the number of patients a PC provider sees each day does not change much either, which is evidenced by the average number of PC in-person visits per patient as shown in Table 1. Despite our earnest effort, there might be some variables

that should be included in the model but we are not aware of. Thus, we conducted Hausman's endogeneity test, which indicate no sign of endogeneity ( $p = 0.2934$ ).

## **2. Sensitivity Analyses**

### **2.1. Inclusion of Medicare Expenditures**

Veteran patients also seek care from providers in the community covered by Medicare coverage. Our stratification analysis by Medicare eligible age (s-Tables 4 and 5) indicates Medicare eligibility did not meaningfully affect the association between PC visits and costs to the VHA. To further validated this result, we obtained data on Medicare expenditures (FY 2016-2019) for VHA enrollees. The VHA (through its program office, Medicare & Medicaid Analysis Center) has a contractual agreement with the CMS (Centers for Medicare and Medicaid Services) to receive Veterans' Medicare data. The VHA receives both fee-for-service and Medicare Advantage (MA) data, but MA costs are not available to the VHA. About 28% of VHA patients using Medicare are enrolled in MA.

With Medicare expenditures added into the outcome (VHA costs), we refitted the multivariate linear model (pooled data and by year) and reported the results in s-Tables 6 and 7. As shown, the estimated cost reduction associated with each additional in-person visit was larger (\$1,157.1) than the reduction with VHA costs only (\$721.2). Refitting the model with in-person visits as a discrete variable yielded similar results and thus not reported here.

### **2.2. Fixed vs. Random Effect Model**

To control for clustering or hospital effects we employed fixed effect models which included all VHA hospitals in the regression as fixed effects. However, fixed effect models do not allow correlations of patient outcomes within hospitals. Hence, such a model may produce inefficient (larger standard errors) albeit unbiased estimates, especially when sample size is small. To ascertain this issue, we refitted the multivariate model with random effects (only FY 2019 data were used due to excessive computing time). As shown in s-Table 8, the random effect model yielded nearly identical estimate of the in-person visit effect (\$783.2) compared to the fixed

effect model (\$797.4; s-Table 2). We chose to report the results of fixed effect models because estimating random effects requires excessive computational resources and running time for this large-scale study, which makes sensitivity analyses challenging.

### **2.3. Alternative Risk Adjustments**

Adjustment for disease severity or patient risk is critically important in observational studies examining healthcare costs. Studies analyzing program/intervention effects on costs often adjust for patient risk by using a group of conditions (e.g., CHF and COPD). However, the estimate of the treatment effect can vary with what and how many conditions are included, and intractable multicollinearity may result if many conditions are used. In addition, using condition groups precludes risk stratification analysis. The CPM (Case-mix for Performance Management) risk score employed in our main analyses was specifically developed to predict VHA costs and has been shown to outperform alternative risk adjusters. Nevertheless, we examined and compared several alternative risk adjustment schemes with FY2019 data.

Considering a large part of the PCP effort is to coordinate care among specialists and manage medications, we postulate that the number of diagnoses of each patient may play a significant role in the relationship between primary care and total patient care cost. Thus, we counted the number of unique ICD-10 CM codes (mean =15.2; sd = 14.3) as a proxy for the number of diagnoses at the patient level and used it in place of the CPM risk score in our multivariate modeling. With this new risk score, the effect of in-person visits was estimated at \$917.2, which was moderately higher than the estimate based on the CPM risk score (\$797.4; s-Table 2).

Given the limitation of using ICD-10 counts as the number of diagnoses (e.g., a diabetic patient can have several different ICD-10 codes recorded), we next mapped all the patients into 530 homogenous CCRS clinical groups by using the crosswalk between ICD-10 codes and CCSR (Clinical Classifications Software Refined, <https://www.hcup-us.ahrq.gov/>). We then counted the number of unique CCSR groups for each patient (mean = 11.6; sd = 9.2) and used it in place of the CPM risk to refit the multivariate cost model; the resultant estimate was \$864.1.

Considering the number of diagnoses per se might not be an optimal predictor of total cost. We subsequently developed a risk model predicting VHA costs based on the 530 homogenous

clinical groups classified by CCSR (Clinical Classifications Software Refined; [https://www.hcup-us.ahrq.gov/toolssoftware/ccsr/ccs\\_refined.jsp](https://www.hcup-us.ahrq.gov/toolssoftware/ccsr/ccs_refined.jsp)), as well as patient age and gender. This alternative risk model yielded high predictive power with VHA costs ( $R^2 = 0.705$ ). Refitting the cost model with this alternative risk score yielded a slightly lower estimate (\$732.8) compared to the result based on the CPM risk score.

To further ascertain the reliability of the risk scores, we expanded the 530 CCSR categories into 950 more clinically homogeneous groups based on the specificity of ICD-10 codes and refitted the patient risk model ( $R^2 = 0.726$ ). Using the resultant risk score in place of the CPM risk score, we refitted the multivariate cost model and reached an estimate of \$751 cost reduction associated with each additional PC in-person visit, close to the estimate based on the CPM risk score.

#### **2.4. Additional Sensitivity Analyses**

In multivariate linear regression, multicollinearity could bias the coefficient estimates. Thus, we assessed whether inclusion/exclusion of telehealth or phone visits in the regression analysis affected the estimated effect of in-person visits on total cost. We re-estimated the effect of in-person visits by excluding telehealth visits from the regression, which yielded an estimate of \$722.3. Likewise, when phone visits were excluded from the regression, the estimated effect was \$736.0, and when both telehealth and phone visits were excluded, the estimate was \$737.3. All these results were close to \$721.2 as reported in Table 3 (pooled data: FY 2016-2019). We also examined multicollinearities between in-person visits and other independent variables and found no appreciable bias.

We further conducted other sensitivity analyses. We refitted the model by excluding HBPC (home-based primary care) patients and/or deceased patients, which resulted in little change of our findings. We also examined different combinations of age and age categories (age only, age categories only, and both), tested interactions and nonlinearity of the independent variables, and ascertained multicollinearity and heteroscedasticity. All these analyses yielded little changes of our findings and are not reported further.

## References

1. Manning WG, Mullahy J. Estimating log models: to transform or not to transform? *J Health Econ.* 2001 Jul;20(4):461-94.
2. Lumley T, Diehr P, Emerson S, Chen L. The importance of the normality assumption in large public health data sets. *Ann Rev Public Health.* 2002;23:151-69.
3. Schmidt AF, Finan C. Linear regression and the normality assumption. *J Clinical Epi* 2018;98:146-51.
4. Feng C, Wang H, Lu N, Chen T, He H, Lu Y, Tu XM. Log-transformation and its implications for data analysis. *Shanghai Arch Psychiatry.* 2014 Apr;26(2):105-9.
5. Balota DA, Aschenbrenner AJ, Yap MJ. Additive effects of word frequency and stimulus quality: the influence of trial history and data transformations. *J Exp Psychol Learn Mem Cogn.* 2013 Sep;39(5):1563-71.
6. Lo S, Andrews S. To transform or not to transform: using generalized linear mixed models to analyse reaction time data. *Front Psychol.* 2015 Aug 7;6:1171. doi: 10.3389/fpsyg.2015.01171.

**s-Table 1. Annual Average Patient Care Costs by CPM Risk Decile and Number of PC Visits  
(Pooled Data: FY2016-2019)**

| CPM Risk Decile | Number of PC Visits (Annual) | Number of Patients | VA Outpatient Cost | VA Inpatient Cost | Community Care Cost | Prescription Drug Cost | Total Cost |
|-----------------|------------------------------|--------------------|--------------------|-------------------|---------------------|------------------------|------------|
| 1               | 0                            | 564,336            | \$1,052            | \$205             | \$120               | \$112                  | \$1,377    |
| 1               | 1                            | 1,271,184          | \$886              | \$2               | \$29                | \$95                   | \$917      |
| 1               | 2                            | 238,206            | \$1,372            | \$0               | \$35                | \$133                  | \$1,407    |
| 1               | 3                            | 38,712             | \$1,777            | \$0               | \$44                | \$143                  | \$1,821    |
| 1               | 4                            | 7,441              | \$2,237            | \$0               | \$59                | \$154                  | \$2,296    |
| 1               | 5                            | 1,939              | \$2,589            | \$0               | \$71                | \$159                  | \$2,660    |
| 1               | 6                            | 619                | \$3,024            | \$0               | \$81                | \$174                  | \$3,105    |
| 1               | 7                            | 227                | \$3,090            | \$0               | \$103               | \$140                  | \$3,193    |
| 1               | 8                            | 127                | \$3,746            | \$0               | \$21                | \$170                  | \$3,767    |
| 1               | 9                            | 75                 | \$3,936            | \$0               | \$35                | \$208                  | \$3,971    |
| 1               | 10                           | 67                 | \$3,583            | \$0               | \$15                | \$138                  | \$3,598    |
| 1               | 11                           | 70                 | \$3,768            | \$0               | \$3                 | \$189                  | \$3,771    |
| 1               | 12                           | 95                 | \$3,858            | \$0               | \$12                | \$189                  | \$3,870    |
| 1               | >12                          | 200                | \$4,637            | \$0               | \$29                | \$214                  | \$4,667    |
| 2               | 0                            | 321,185            | \$1,668            | \$304             | \$307               | \$196                  | \$2,279    |
| 2               | 1                            | 1,214,295          | \$1,298            | \$5               | \$64                | \$161                  | \$1,366    |
| 2               | 2                            | 445,130            | \$1,758            | \$2               | \$63                | \$198                  | \$1,823    |
| 2               | 3                            | 106,214            | \$2,144            | \$0               | \$72                | \$205                  | \$2,216    |
| 2               | 4                            | 24,733             | \$2,551            | \$0               | \$83                | \$217                  | \$2,633    |
| 2               | 5                            | 6,664              | \$2,993            | \$0               | \$105               | \$262                  | \$3,098    |
| 2               | 6                            | 2,058              | \$3,269            | \$0               | \$138               | \$228                  | \$3,407    |
| 2               | 7                            | 869                | \$3,618            | \$0               | \$105               | \$314                  | \$3,723    |
| 2               | 8                            | 400                | \$3,957            | \$0               | \$248               | \$280                  | \$4,205    |
| 2               | 9                            | 247                | \$4,191            | \$0               | \$118               | \$417                  | \$4,309    |
| 2               | 10                           | 159                | \$3,965            | \$0               | \$31                | \$227                  | \$3,996    |
| 2               | 11                           | 164                | \$4,383            | \$0               | \$39                | \$512                  | \$4,422    |
| 2               | 12                           | 249                | \$4,544            | \$0               | \$22                | \$518                  | \$4,566    |
| 2               | >12                          | 588                | \$5,763            | \$0               | \$43                | \$391                  | \$5,805    |
| 3               | 0                            | 204,226            | \$2,578            | \$331             | \$505               | \$302                  | \$3,414    |
| 3               | 1                            | 1,075,058          | \$1,829            | \$9               | \$120               | \$234                  | \$1,958    |
| 3               | 2                            | 580,282            | \$2,262            | \$4               | \$108               | \$265                  | \$2,374    |
| 3               | 3                            | 183,371            | \$2,662            | \$3               | \$118               | \$275                  | \$2,783    |
| 3               | 4                            | 52,786             | \$3,050            | \$2               | \$129               | \$300                  | \$3,181    |
| 3               | 5                            | 15,768             | \$3,405            | \$5               | \$151               | \$306                  | \$3,561    |
| 3               | 6                            | 5,341              | \$3,871            | \$7               | \$194               | \$385                  | \$4,072    |
| 3               | 7                            | 2,026              | \$4,258            | \$7               | \$225               | \$475                  | \$4,490    |
| 3               | 8                            | 965                | \$4,585            | \$0               | \$231               | \$433                  | \$4,816    |
| 3               | 9                            | 532                | \$4,917            | \$0               | \$140               | \$571                  | \$5,056    |
| 3               | 10                           | 354                | \$5,038            | \$0               | \$298               | \$457                  | \$5,336    |
| 3               | 11                           | 299                | \$5,290            | \$0               | \$118               | \$619                  | \$5,408    |
| 3               | 12                           | 415                | \$6,123            | \$0               | \$118               | \$796                  | \$6,241    |
| 3               | >12                          | 1,183              | \$6,795            | \$2               | \$161               | \$706                  | \$6,958    |



**s-Table 1. Annual Average Patient Care Costs by CPM Risk Decile and Number of PC Visits  
(Pooled Data: FY2016-2019)**

| CPM Risk Decile | Number of PC Visits (Annual) | Number of Patients | VA Outpatient Cost | VA Inpatient Cost | Community Care Cost | Prescription Drug Cost | Total Cost |
|-----------------|------------------------------|--------------------|--------------------|-------------------|---------------------|------------------------|------------|
| 4               | 0                            | 150,549            | \$3,698            | \$457             | \$736               | \$451                  | \$4,891    |
| 4               | 1                            | 911,362            | \$2,532            | \$17              | \$197               | \$327                  | \$2,746    |
| 4               | 2                            | 655,760            | \$2,948            | \$8               | \$167               | \$361                  | \$3,122    |
| 4               | 3                            | 262,334            | \$3,322            | \$7               | \$189               | \$355                  | \$3,517    |
| 4               | 4                            | 90,600             | \$3,702            | \$6               | \$207               | \$369                  | \$3,915    |
| 4               | 5                            | 30,569             | \$4,078            | \$12              | \$214               | \$409                  | \$4,304    |
| 4               | 6                            | 11,117             | \$4,496            | \$3               | \$288               | \$432                  | \$4,787    |
| 4               | 7                            | 4,442              | \$4,716            | \$8               | \$337               | \$412                  | \$5,061    |
| 4               | 8                            | 1,990              | \$5,168            | \$3               | \$284               | \$489                  | \$5,455    |
| 4               | 9                            | 1,152              | \$5,450            | \$36              | \$243               | \$563                  | \$5,729    |
| 4               | 10                           | 720                | \$5,464            | \$0               | \$266               | \$498                  | \$5,730    |
| 4               | 11                           | 553                | \$5,582            | \$0               | \$141               | \$522                  | \$5,722    |
| 4               | 12                           | 652                | \$6,708            | \$0               | \$259               | \$1,152                | \$6,967    |
| 4               | >12                          | 2,138              | \$7,353            | \$0               | \$179               | \$747                  | \$7,531    |
| 5               | 0                            | 119,814            | \$5,031            | \$700             | \$1,055             | \$662                  | \$6,785    |
| 5               | 1                            | 752,669            | \$3,505            | \$35              | \$324               | \$460                  | \$3,864    |
| 5               | 2                            | 685,134            | \$3,856            | \$24              | \$260               | \$475                  | \$4,140    |
| 5               | 3                            | 336,305            | \$4,217            | \$13              | \$272               | \$466                  | \$4,501    |
| 5               | 4                            | 135,586            | \$4,595            | \$19              | \$287               | \$511                  | \$4,900    |
| 5               | 5                            | 51,599             | \$4,946            | \$11              | \$353               | \$468                  | \$5,310    |
| 5               | 6                            | 20,407             | \$5,342            | \$13              | \$336               | \$715                  | \$5,691    |
| 5               | 7                            | 8,551              | \$5,670            | \$14              | \$436               | \$532                  | \$6,119    |
| 5               | 8                            | 3,901              | \$6,111            | \$81              | \$489               | \$602                  | \$6,681    |
| 5               | 9                            | 2,110              | \$6,392            | \$1               | \$361               | \$580                  | \$6,754    |
| 5               | 10                           | 1,245              | \$6,713            | \$15              | \$360               | \$763                  | \$7,088    |
| 5               | 11                           | 936                | \$7,032            | \$33              | \$376               | \$722                  | \$7,441    |
| 5               | 12                           | 977                | \$6,625            | \$16              | \$301               | \$804                  | \$6,943    |
| 5               | >12                          | 3,352              | \$8,782            | \$1               | \$340               | \$1,105                | \$9,123    |
| 6               | 0                            | 96,574             | \$6,802            | \$1,361           | \$1,496             | \$906                  | \$9,659    |
| 6               | 1                            | 607,674            | \$4,885            | \$114             | \$514               | \$663                  | \$5,514    |
| 6               | 2                            | 680,777            | \$5,132            | \$58              | \$403               | \$651                  | \$5,592    |
| 6               | 3                            | 398,788            | \$5,456            | \$44              | \$397               | \$627                  | \$5,897    |
| 6               | 4                            | 186,537            | \$5,807            | \$40              | \$432               | \$617                  | \$6,279    |
| 6               | 5                            | 80,684             | \$6,131            | \$27              | \$466               | \$611                  | \$6,625    |
| 6               | 6                            | 34,731             | \$6,474            | \$33              | \$501               | \$640                  | \$7,008    |
| 6               | 7                            | 15,358             | \$6,813            | \$70              | \$545               | \$674                  | \$7,428    |
| 6               | 8                            | 7,504              | \$7,155            | \$25              | \$557               | \$653                  | \$7,737    |
| 6               | 9                            | 3,867              | \$7,645            | \$8               | \$601               | \$811                  | \$8,254    |
| 6               | 10                           | 2,293              | \$7,780            | \$9               | \$602               | \$820                  | \$8,391    |
| 6               | 11                           | 1,566              | \$7,995            | \$35              | \$533               | \$928                  | \$8,564    |
| 6               | 12                           | 1,449              | \$8,512            | \$43              | \$532               | \$1,199                | \$9,087    |
| 6               | >12                          | 5,358              | \$10,135           | \$9               | \$373               | \$1,436                | \$10,516   |

**s-Table 1. Annual Average Patient Care Costs by CPM Risk Decile and Number of PC Visits  
(Pooled Data: FY2016-2019)**

| CPM Risk Decile | Number of PC Visits (Annual) | Number of Patients | VA Outpatient Cost | VA Inpatient Cost | Community Care Cost | Prescription Drug Cost | Total Cost |
|-----------------|------------------------------|--------------------|--------------------|-------------------|---------------------|------------------------|------------|
| 7               | 0                            | 84,705             | \$9,259            | \$2,714           | \$2,498             | \$1,286                | \$14,470   |
| 7               | 1                            | 478,314            | \$6,961            | \$346             | \$835               | \$1,024                | \$8,141    |
| 7               | 2                            | 637,905            | \$7,057            | \$179             | \$634               | \$922                  | \$7,870    |
| 7               | 3                            | 445,402            | \$7,289            | \$140             | \$622               | \$866                  | \$8,051    |
| 7               | 4                            | 240,452            | \$7,583            | \$122             | \$651               | \$834                  | \$8,356    |
| 7               | 5                            | 116,916            | \$7,920            | \$109             | \$689               | \$839                  | \$8,717    |
| 7               | 6                            | 55,578             | \$8,189            | \$95              | \$740               | \$832                  | \$9,025    |
| 7               | 7                            | 26,792             | \$8,544            | \$69              | \$758               | \$839                  | \$9,371    |
| 7               | 8                            | 13,225             | \$8,794            | \$102             | \$822               | \$979                  | \$9,718    |
| 7               | 9                            | 7,092              | \$9,175            | \$65              | \$823               | \$877                  | \$10,063   |
| 7               | 10                           | 4,171              | \$9,722            | \$72              | \$903               | \$1,151                | \$10,697   |
| 7               | 11                           | 2,648              | \$10,212           | \$57              | \$740               | \$1,159                | \$11,009   |
| 7               | 12                           | 2,249              | \$10,348           | \$82              | \$604               | \$1,310                | \$11,034   |
| 7               | >12                          | 8,210              | \$12,215           | \$47              | \$670               | \$1,499                | \$12,931   |
| 8               | 0                            | 84,275             | \$13,345           | \$4,802           | \$3,659             | \$2,570                | \$21,806   |
| 8               | 1                            | 365,400            | \$10,046           | \$1,131           | \$1,506             | \$1,589                | \$12,683   |
| 8               | 2                            | 563,602            | \$10,026           | \$635             | \$1,072             | \$1,385                | \$11,733   |
| 8               | 3                            | 464,059            | \$10,192           | \$490             | \$1,006             | \$1,269                | \$11,688   |
| 8               | 4                            | 290,751            | \$10,412           | \$405             | \$1,010             | \$1,215                | \$11,828   |
| 8               | 5                            | 160,570            | \$10,670           | \$356             | \$1,098             | \$1,177                | \$12,124   |
| 8               | 6                            | 84,915             | \$10,949           | \$300             | \$1,102             | \$1,172                | \$12,352   |
| 8               | 7                            | 43,857             | \$11,327           | \$311             | \$1,214             | \$1,196                | \$12,852   |
| 8               | 8                            | 23,551             | \$11,733           | \$245             | \$1,223             | \$1,217                | \$13,202   |
| 8               | 9                            | 12,981             | \$12,088           | \$289             | \$1,323             | \$1,278                | \$13,701   |
| 8               | 10                           | 7,673              | \$12,294           | \$245             | \$1,298             | \$1,240                | \$13,837   |
| 8               | 11                           | 5,003              | \$12,442           | \$370             | \$1,230             | \$1,290                | \$14,042   |
| 8               | 12                           | 3,794              | \$13,205           | \$254             | \$1,219             | \$1,489                | \$14,678   |
| 8               | >12                          | 13,267             | \$15,226           | \$181             | \$1,013             | \$1,962                | \$16,419   |
| 9               | 0                            | 101,385            | \$18,969           | \$9,852           | \$5,444             | \$3,835                | \$34,265   |
| 9               | 1                            | 267,256            | \$15,213           | \$4,351           | \$3,063             | \$2,699                | \$22,626   |
| 9               | 2                            | 456,359            | \$15,216           | \$2,683           | \$2,171             | \$2,346                | \$20,070   |
| 9               | 3                            | 443,207            | \$15,316           | \$2,120           | \$1,954             | \$2,091                | \$19,389   |
| 9               | 4                            | 328,771            | \$15,537           | \$1,809           | \$1,916             | \$1,950                | \$19,262   |
| 9               | 5                            | 208,103            | \$15,788           | \$1,561           | \$1,923             | \$1,858                | \$19,273   |
| 9               | 6                            | 124,425            | \$16,104           | \$1,375           | \$2,004             | \$1,799                | \$19,483   |
| 9               | 7                            | 72,358             | \$16,363           | \$1,256           | \$2,064             | \$1,771                | \$19,683   |
| 9               | 8                            | 41,674             | \$16,855           | \$1,216           | \$2,048             | \$1,783                | \$20,118   |
| 9               | 9                            | 24,787             | \$17,119           | \$1,093           | \$2,150             | \$1,814                | \$20,362   |
| 9               | 10                           | 15,152             | \$17,299           | \$1,004           | \$2,123             | \$1,723                | \$20,426   |
| 9               | 11                           | 9,699              | \$17,743           | \$1,053           | \$2,316             | \$1,821                | \$21,112   |
| 9               | 12                           | 6,804              | \$18,240           | \$1,231           | \$2,184             | \$1,940                | \$21,656   |
| 9               | >12                          | 22,706             | \$20,485           | \$936             | \$1,926             | \$2,349                | \$23,347   |

**s-Table 1. Annual Average Patient Care Costs by CPM Risk Decile and Number of PC Visits (Pooled Data: FY2016-2019)**

| CPM Risk Decile | Number of PC Visits (Annual) | Number of Patients | VA Outpatient Cost | VA Inpatient Cost | Community Care Cost | Prescription Drug Cost | Total Cost |
|-----------------|------------------------------|--------------------|--------------------|-------------------|---------------------|------------------------|------------|
| 10              | 0                            | 153,207            | \$31,576           | \$41,220          | \$12,898            | \$6,281                | \$85,694   |
| 10              | 1                            | 203,374            | \$26,594           | \$32,946          | \$9,748             | \$5,529                | \$69,288   |
| 10              | 2                            | 315,723            | \$27,253           | \$24,156          | \$7,603             | \$5,136                | \$59,012   |
| 10              | 3                            | 350,971            | \$28,136           | \$20,582          | \$6,888             | \$4,879                | \$55,606   |
| 10              | 4                            | 309,975            | \$28,938           | \$18,994          | \$6,620             | \$4,587                | \$54,552   |
| 10              | 5                            | 238,998            | \$29,970           | \$18,341          | \$6,696             | \$4,487                | \$55,007   |
| 10              | 6                            | 170,330            | \$30,996           | \$18,148          | \$6,877             | \$4,400                | \$56,021   |
| 10              | 7                            | 116,035            | \$32,129           | \$18,254          | \$7,019             | \$4,404                | \$57,402   |
| 10              | 8                            | 78,356             | \$33,278           | \$18,404          | \$7,202             | \$4,462                | \$58,883   |
| 10              | 9                            | 52,399             | \$34,300           | \$18,239          | \$7,468             | \$4,411                | \$60,007   |
| 10              | 10                           | 35,646             | \$35,356           | \$18,447          | \$7,613             | \$4,504                | \$61,416   |
| 10              | 11                           | 24,297             | \$36,524           | \$19,096          | \$7,817             | \$4,550                | \$63,438   |
| 10              | 12                           | 17,467             | \$37,383           | \$19,385          | \$7,854             | \$4,603                | \$64,623   |
| 10              | >12                          | 55,900             | \$41,252           | \$18,658          | \$7,619             | \$5,147                | \$67,529   |

**s-Table 2. Multivariate Linear Model Estimate of PC Visit Effect on Total Patient Care Cost by Fiscal Year (FY2016-2019)**

| Variable                               | FY2016 (N=5,186,112) |         | FY2017 (N=5,261,550) |         | FY2018 (N=5,373,568) |         | FY2019 (N=5,410,034) |         |
|----------------------------------------|----------------------|---------|----------------------|---------|----------------------|---------|----------------------|---------|
|                                        | Parameter Estimate   | Pr >  t |
| Intercept                              | -20,849.00           | <.0001  | -20,767.00           | <.0001  | -21,756.00           | <.0001  | -23,625.00           | <.0001  |
| Number of PC Visits (in person)        | -664.17              | <.0001  | -658.89              | <.0001  | -748.39              | <.0001  | -797.42              | <.0001  |
| Number of PC Visits (telehealth)       | -438.49              | <.0001  | -265.04              | <.0001  | -271.94              | <.0001  | -328.08              | <.0001  |
| Number of PC Visits (phone)            | -93.92               | <.0001  | -58.29               | <.0001  | -86.53               | <.0001  | -67.97               | <.0001  |
| Age                                    | -77.97               | <.0001  | -70.47               | <.0001  | -66.75               | <.0001  | -55.99               | <.0001  |
| Age >= 35 and < 45                     | 859.32               | <.0001  | 569.72               | <.0001  | 388.65               | <.0001  | 315.62               | <.0001  |
| Age >= 45 and < 55                     | 1,721.96             | <.0001  | 1,385.35             | <.0001  | 1,180.31             | <.0001  | 1,012.35             | <.0001  |
| Age >= 55 and < 65                     | 2,462.72             | <.0001  | 2,000.97             | <.0001  | 1,678.13             | <.0001  | 1,406.07             | <.0001  |
| Age >= 65 and < 75                     | 3,061.28             | <.0001  | 2,571.87             | <.0001  | 2,244.80             | <.0001  | 1,777.33             | <.0001  |
| Age >= 75                              | 4,344.88             | <.0001  | 3,806.32             | <.0001  | 3,498.61             | <.0001  | 2,859.28             | <.0001  |
| Gender (Female)                        | -496.82              | <.0001  | -552.94              | <.0001  | -645.58              | <.0001  | -675.75              | <.0001  |
| Marital Status (Married)               | -703.73              | <.0001  | -692.95              | <.0001  | -745.69              | <.0001  | -733.76              | <.0001  |
| Racial Status (White)                  | -1,259.93            | <.0001  | -1,025.06            | <.0001  | -584.00              | <.0001  | 301.20               | <.0001  |
| Racial Status (Black)                  | -1,706.00            | <.0001  | -1,337.13            | <.0001  | -780.14              | <.0001  | 116.91               | 0.0005  |
| Enrolled in Medicare                   | 110.23               | <.0001  | 124.16               | <.0001  | 211.89               | <.0001  | 278.69               | <.0001  |
| Enrolled in Medicaid                   | 170.72               | 0.0095  | 458.03               | <.0001  | 130.89               | 0.0544  | 303.57               | <.0001  |
| Covered by Private Insurance           | -1,446.96            | <.0001  | -1,524.10            | <.0001  | -1,593.83            | <.0001  | -1,562.93            | <.0001  |
| Disability Rating (%)                  | -9.33                | <.0001  | -9.64                | <.0001  | -9.22                | <.0001  | -8.42                | <.0001  |
| Disability Rating 70%+ (% of patients) | 98.50                | 0.0055  | 76.31                | 0.025   | 124.64               | 0.0003  | 119.27               | 0.0005  |
| Drive Time to Closest VHA PCP (Min)    | -3.34                | <.0001  | -3.66                | <.0001  | -3.59                | <.0001  | -3.84                | <.0001  |
| CPM Risk Score                         | 378.73               | <.0001  | 381.23               | <.0001  | 399.91               | <.0001  | 411.87               | <.0001  |

Notes: The fixed effects of the 140 hospitals are not shown here. Age < 35, racial status (other) were used as reference groups.

**s-Table 3. Multivariate Linear Model Estimate of PC Visit Effect on Total Patient Care Cost (Effect of Discrete Visits; by Fiscal Year: FY2016-2019)**

| Variable                               | FY2016 (N=5,186,112) |         | FY2017 (N=5,261,550) |         | FY2018 (N=5,373,568) |         | FY2019 (N=5,410,034) |         |
|----------------------------------------|----------------------|---------|----------------------|---------|----------------------|---------|----------------------|---------|
|                                        | Parameter Estimate   | Pr >  t |
| Intercept                              | -19,201.00           | <.0001  | -18,680.00           | <.0001  | -19,648.00           | <.0001  | -21,010.00           | <.0001  |
| In-person Visit 1                      | -3,619.13            | <.0001  | -3,751.82            | <.0001  | -4,142.74            | <.0001  | -4,300.50            | <.0001  |
| In-person Visit 2                      | -4,657.11            | <.0001  | -4,826.61            | <.0001  | -5,345.76            | <.0001  | -5,521.71            | <.0001  |
| In-person Visit 3                      | -5,486.79            | <.0001  | -5,667.00            | <.0001  | -6,276.39            | <.0001  | -6,493.52            | <.0001  |
| In-person Visit 4                      | -6,258.09            | <.0001  | -6,375.59            | <.0001  | -7,058.65            | <.0001  | -7,271.77            | <.0001  |
| In-person Visit 5                      | -6,886.23            | <.0001  | -6,991.64            | <.0001  | -7,714.18            | <.0001  | -8,002.15            | <.0001  |
| In-person Visit 6                      | -7,447.49            | <.0001  | -7,535.69            | <.0001  | -8,349.57            | <.0001  | -8,781.84            | <.0001  |
| In-person Visit 7                      | -7,986.95            | <.0001  | -8,201.90            | <.0001  | -8,884.67            | <.0001  | -9,298.70            | <.0001  |
| In-person Visit 8                      | -8,440.93            | <.0001  | -8,796.20            | <.0001  | -9,437.74            | <.0001  | -9,719.15            | <.0001  |
| In-person Visit 9                      | -8,965.80            | <.0001  | -9,057.08            | <.0001  | -9,815.41            | <.0001  | -10,472.00           | <.0001  |
| In-person Visit 10                     | -9,331.83            | <.0001  | -9,461.16            | <.0001  | -9,944.35            | <.0001  | -10,613.00           | <.0001  |
| In-person Visit 11                     | -9,529.83            | <.0001  | -9,288.34            | <.0001  | -9,952.73            | <.0001  | -10,379.00           | <.0001  |
| In-person Visit 12                     | -8,208.09            | <.0001  | -8,461.78            | <.0001  | -9,616.80            | <.0001  | -9,968.56            | <.0001  |
| In-person Visits >12                   | -7,694.79            | <.0001  | -6,744.19            | <.0001  | -7,608.13            | <.0001  | -8,253.23            | <.0001  |
| Number of Visits (tele-health)         | -442.13              | <.0001  | -267.77              | <.0001  | -289.27              | <.0001  | -356.26              | <.0001  |
| Number of Visits (phone)               | -65.08               | <.0001  | -28.78               | <.0001  | -58.03               | <.0001  | -41.12               | <.0001  |
| Age                                    | -67.82               | <.0001  | -68.75               | <.0001  | -60.78               | <.0001  | -52.00               | <.0001  |
| Age >= 35 and < 45                     | 904.21               | <.0001  | 667.41               | <.0001  | 481.22               | <.0001  | 427.90               | <.0001  |
| Age >= 45 and < 55                     | 1,751.57             | <.0001  | 1,557.00             | <.0001  | 1,322.80             | <.0001  | 1,216.43             | <.0001  |
| Age >= 55 and < 65                     | 2,472.83             | <.0001  | 2,232.60             | <.0001  | 1,835.47             | <.0001  | 1,650.60             | <.0001  |
| Age >= 65 and < 75                     | 3,027.94             | <.0001  | 2,827.47             | <.0001  | 2,389.22             | <.0001  | 2,037.82             | <.0001  |
| Age >= 75                              | 4,083.99             | <.0001  | 3,922.07             | <.0001  | 3,413.62             | <.0001  | 2,902.48             | <.0001  |
| Gender (Female)                        | -414.49              | <.0001  | -477.30              | <.0001  | -553.38              | <.0001  | -589.11              | <.0001  |
| Marital Status (Married)               | -662.22              | <.0001  | -645.28              | <.0001  | -678.81              | <.0001  | -659.52              | <.0001  |
| Racial Status (White)                  | -923.15              | <.0001  | -659.19              | <.0001  | -65.65               | 0.0023  | 365.18               | <.0001  |
| Racial Status (Black)                  | -1,390.36            | <.0001  | -998.05              | <.0001  | -290.06              | <.0001  | 167.54               | <.0001  |
| Enrolled in Medicare                   | 103.00               | <.0001  | 130.47               | <.0001  | 207.15               | <.0001  | 282.15               | <.0001  |
| Enrolled in Medicaid                   | 169.38               | 0.0099  | 438.40               | <.0001  | 85.64                | 0.2069  | 262.76               | 0.0001  |
| Covered by Private Insurance           | -1,416.44            | <.0001  | -1,490.44            | <.0001  | -1,540.30            | <.0001  | -1,499.76            | <.0001  |
| Disability Rating (%)                  | -8.81                | <.0001  | -9.15                | <.0001  | -8.34                | <.0001  | -7.30                | <.0001  |
| Disability Rating 70%+ (% of patients) | 77.23                | 0.0291  | 55.08                | 0.1048  | 87.21                | 0.0108  | 75.09                | 0.0286  |
| Drive Time to Closest VHA PCP (Min)    | -3.42                | <.0001  | -3.68                | <.0001  | -3.80                | <.0001  | -4.18                | <.0001  |
| CPM Risk Score                         | 379.07               | <.0001  | 381.45               | <.0001  | 399.65               | <.0001  | 411.34               | <.0001  |

Notes: The fixed effects of the 140 hospitals are not shown here. Visit 0 or no visit, age < 35, racial status (other) were used as reference groups.

**s-Table 4. Annual Average Patient Care Costs by Risk Decile, Number of PC Visits and Medicare Eligibility Age (Pooled FY2016-2019)**

| Age <= 65   |                              |                    |                 |                |                     |                        |            | Age > 65           |                 |                |                     |                        |            |
|-------------|------------------------------|--------------------|-----------------|----------------|---------------------|------------------------|------------|--------------------|-----------------|----------------|---------------------|------------------------|------------|
| Risk Decile | Number of PC Visits (Annual) | Number of Patients | VA              |                | Community Care Cost | Prescription Drug Cost | Total Cost | Number of Patients | VA              |                | Community Care Cost | Prescription Drug Cost | Total Cost |
|             |                              |                    | Outpatient Cost | Inpatient Cost |                     |                        |            |                    | Outpatient Cost | Inpatient Cost |                     |                        |            |
| 1           | 0                            | 301,880            | \$844           | \$158          | \$138               | \$89                   | \$1,141    | 262,456            | \$1,292         | \$258          | \$99                | \$138                  | \$1,648    |
| 1           | 1                            | 551,031            | \$865           | \$1            | \$29                | \$56                   | \$894      | 720,153            | \$903           | \$3            | \$29                | \$125                  | \$934      |
| 1           | 2                            | 97,113             | \$1,392         | \$0            | \$40                | \$86                   | \$1,432    | 141,093            | \$1,358         | \$0            | \$32                | \$165                  | \$1,390    |
| 1           | 3                            | 15,951             | \$1,848         | \$0            | \$47                | \$107                  | \$1,895    | 22,761             | \$1,728         | \$0            | \$41                | \$168                  | \$1,769    |
| 1           | 4                            | 3,282              | \$2,248         | \$0            | \$90                | \$112                  | \$2,338    | 4,159              | \$2,228         | \$0            | \$34                | \$186                  | \$2,262    |
| 1           | 5                            | 936                | \$2,522         | \$0            | \$81                | \$110                  | \$2,602    | 1,003              | \$2,651         | \$0            | \$63                | \$205                  | \$2,714    |
| 1           | 6                            | 300                | \$2,909         | \$0            | \$43                | \$116                  | \$2,952    | 319                | \$3,132         | \$0            | \$117               | \$228                  | \$3,249    |
| 1           | 7                            | 109                | \$3,216         | \$0            | \$72                | \$128                  | \$3,288    | 118                | \$2,974         | \$0            | \$131               | \$151                  | \$3,106    |
| 1           | 8                            | 47                 | \$4,440         | \$0            | \$44                | \$70                   | \$4,484    | 80                 | \$3,338         | \$0            | \$7                 | \$229                  | \$3,345    |
| 1           | 9                            | 28                 | \$3,795         | \$0            | \$94                | \$176                  | \$3,890    | 47                 | \$4,020         | \$0            | \$0                 | \$227                  | \$4,020    |
| 1           | 10                           | 25                 | \$4,094         | \$0            | \$40                | \$99                   | \$4,134    | 42                 | \$3,279         | \$0            | \$0                 | \$161                  | \$3,279    |
| 1           | 11                           | 19                 | \$4,897         | \$0            | \$0                 | \$132                  | \$4,897    | 51                 | \$3,347         | \$0            | \$4                 | \$211                  | \$3,351    |
| 1           | 12                           | 15                 | \$3,506         | \$0            | \$9                 | \$75                   | \$3,515    | 80                 | \$3,924         | \$0            | \$13                | \$210                  | \$3,937    |
| 1           | >12                          | 67                 | \$5,330         | \$0            | \$29                | \$211                  | \$5,359    | 133                | \$4,288         | \$0            | \$30                | \$216                  | \$4,318    |
| 2           | 0                            | 205,840            | \$1,457         | \$231          | \$241               | \$159                  | \$1,929    | 115,345            | \$2,045         | \$436          | \$425               | \$261                  | \$2,906    |
| 2           | 1                            | 555,009            | \$1,323         | \$5            | \$58                | \$106                  | \$1,386    | 659,286            | \$1,276         | \$4            | \$68                | \$208                  | \$1,349    |
| 2           | 2                            | 191,877            | \$1,790         | \$1            | \$70                | \$134                  | \$1,861    | 253,253            | \$1,733         | \$2            | \$58                | \$246                  | \$1,794    |
| 2           | 3                            | 44,273             | \$2,214         | \$0            | \$80                | \$147                  | \$2,294    | 61,941             | \$2,094         | \$0            | \$66                | \$247                  | \$2,161    |
| 2           | 4                            | 10,312             | \$2,608         | \$0            | \$90                | \$159                  | \$2,698    | 14,421             | \$2,510         | \$0            | \$77                | \$258                  | \$2,587    |
| 2           | 5                            | 2,866              | \$3,020         | \$0            | \$100               | \$170                  | \$3,120    | 3,798              | \$2,973         | \$0            | \$108               | \$332                  | \$3,081    |
| 2           | 6                            | 854                | \$3,391         | \$0            | \$96                | \$211                  | \$3,487    | 1,204              | \$3,183         | \$0            | \$168               | \$240                  | \$3,351    |
| 2           | 7                            | 346                | \$3,740         | \$0            | \$75                | \$171                  | \$3,816    | 523                | \$3,537         | \$0            | \$125               | \$409                  | \$3,662    |
| 2           | 8                            | 176                | \$4,160         | \$0            | \$95                | \$248                  | \$4,254    | 224                | \$3,797         | \$0            | \$369               | \$306                  | \$4,166    |
| 2           | 9                            | 94                 | \$4,726         | \$0            | \$83                | \$698                  | \$4,809    | 153                | \$3,862         | \$0            | \$140               | \$245                  | \$4,002    |
| 2           | 10                           | 54                 | \$3,981         | \$0            | \$88                | \$208                  | \$4,069    | 105                | \$3,957         | \$0            | \$2                 | \$237                  | \$3,959    |
| 2           | 11                           | 46                 | \$5,701         | \$0            | \$55                | \$1,186                | \$5,756    | 118                | \$3,869         | \$0            | \$33                | \$250                  | \$3,902    |
| 2           | 12                           | 41                 | \$6,898         | \$0            | \$19                | \$1,886                | \$6,917    | 208                | \$4,080         | \$0            | \$23                | \$249                  | \$4,103    |
| 2           | >12                          | 162                | \$6,280         | \$0            | \$60                | \$340                  | \$6,341    | 426                | \$5,566         | \$0            | \$36                | \$410                  | \$5,602    |
| 3           | 0                            | 135,517            | \$2,366         | \$235          | \$340               | \$264                  | \$2,941    | 68,709             | \$2,995         | \$523          | \$829               | \$376                  | \$4,346    |
| 3           | 1                            | 520,046            | \$1,893         | \$6            | \$103               | \$160                  | \$2,003    | 555,012            | \$1,770         | \$12           | \$135               | \$302                  | \$1,916    |
| 3           | 2                            | 267,367            | \$2,314         | \$5            | \$107               | \$190                  | \$2,426    | 312,915            | \$2,219         | \$3            | \$108               | \$330                  | \$2,330    |
| 3           | 3                            | 81,672             | \$2,721         | \$6            | \$121               | \$204                  | \$2,848    | 101,699            | \$2,615         | \$0            | \$115               | \$331                  | \$2,730    |
| 3           | 4                            | 22,964             | \$3,145         | \$3            | \$139               | \$227                  | \$3,286    | 29,822             | \$2,978         | \$1            | \$121               | \$357                  | \$3,100    |
| 3           | 5                            | 6,859              | \$3,476         | \$1            | \$151               | \$238                  | \$3,628    | 8,909              | \$3,350         | \$9            | \$151               | \$359                  | \$3,510    |
| 3           | 6                            | 2,362              | \$3,944         | \$15           | \$179               | \$392                  | \$4,139    | 2,979              | \$3,814         | \$0            | \$205               | \$380                  | \$4,019    |
| 3           | 7                            | 803                | \$4,593         | \$0            | \$126               | \$570                  | \$4,719    | 1,223              | \$4,038         | \$11           | \$290               | \$413                  | \$4,339    |
| 3           | 8                            | 409                | \$4,967         | \$0            | \$166               | \$447                  | \$5,133    | 556                | \$4,304         | \$0            | \$280               | \$424                  | \$4,584    |
| 3           | 9                            | 174                | \$5,480         | \$0            | \$79                | \$811                  | \$5,559    | 358                | \$4,643         | \$0            | \$169               | \$454                  | \$4,812    |
| 3           | 10                           | 122                | \$5,542         | \$0            | \$415               | \$606                  | \$5,957    | 232                | \$4,773         | \$0            | \$236               | \$378                  | \$5,009    |
| 3           | 11                           | 111                | \$6,165         | \$0            | \$70                | \$862                  | \$6,235    | 188                | \$4,774         | \$0            | \$146               | \$476                  | \$4,920    |
| 3           | 12                           | 105                | \$6,035         | \$0            | \$83                | \$886                  | \$6,119    | 310                | \$6,153         | \$0            | \$130               | \$765                  | \$6,283    |
| 3           | >12                          | 345                | \$7,198         | \$0            | \$48                | \$353                  | \$7,245    | 838                | \$6,629         | \$3            | \$208               | \$851                  | \$6,840    |

**s-Table 4. Annual Average Patient Care Costs by Risk Decile, Number of PC Visits and Medicare Eligibility Age (Pooled FY2016-2019)**

| Risk Decile | Number of PC Visits (Annual) | Age <= 65          |                 |                |                     |                        |            |                    | Age > 65        |                |                     |                        |            |
|-------------|------------------------------|--------------------|-----------------|----------------|---------------------|------------------------|------------|--------------------|-----------------|----------------|---------------------|------------------------|------------|
|             |                              | Number of Patients | VA              |                | Community Care Cost | Prescription Drug Cost | Total Cost | Number of Patients | VA              |                | Community Care Cost | Prescription Drug Cost | Total Cost |
|             |                              |                    | Outpatient Cost | Inpatient Cost |                     |                        |            |                    | Outpatient Cost | Inpatient Cost |                     |                        |            |
| 4           | 0                            | 100,695            | \$3,387         | \$361          | \$426               | \$380                  | \$4,174    | 49,854             | \$4,325         | \$651          | \$1,364             | \$593                  | \$6,340    |
| 4           | 1                            | 465,620            | \$2,633         | \$17           | \$155               | \$240                  | \$2,805    | 445,742            | \$2,427         | \$17           | \$241               | \$419                  | \$2,685    |
| 4           | 2                            | 316,459            | \$3,020         | \$9            | \$161               | \$272                  | \$3,190    | 339,301            | \$2,880         | \$6            | \$173               | \$444                  | \$3,059    |
| 4           | 3                            | 123,493            | \$3,391         | \$3            | \$189               | \$277                  | \$3,582    | 138,841            | \$3,260         | \$11           | \$189               | \$426                  | \$3,459    |
| 4           | 4                            | 41,566             | \$3,773         | \$8            | \$202               | \$289                  | \$3,982    | 49,034             | \$3,642         | \$4            | \$211               | \$437                  | \$3,858    |
| 4           | 5                            | 13,893             | \$4,159         | \$5            | \$205               | \$335                  | \$4,368    | 16,676             | \$4,011         | \$19           | \$222               | \$470                  | \$4,251    |
| 4           | 6                            | 4,921              | \$4,579         | \$5            | \$234               | \$360                  | \$4,817    | 6,196              | \$4,430         | \$2            | \$331               | \$489                  | \$4,764    |
| 4           | 7                            | 1,871              | \$4,791         | \$11           | \$215               | \$362                  | \$5,017    | 2,571              | \$4,661         | \$6            | \$426               | \$448                  | \$5,093    |
| 4           | 8                            | 838                | \$5,438         | \$0            | \$287               | \$471                  | \$5,725    | 1,152              | \$4,972         | \$5            | \$282               | \$502                  | \$5,259    |
| 4           | 9                            | 460                | \$5,938         | \$0            | \$357               | \$548                  | \$6,295    | 692                | \$5,126         | \$59           | \$168               | \$573                  | \$5,353    |
| 4           | 10                           | 247                | \$5,919         | \$0            | \$207               | \$499                  | \$6,126    | 473                | \$5,227         | \$0            | \$296               | \$497                  | \$5,523    |
| 4           | 11                           | 166                | \$6,016         | \$0            | \$174               | \$432                  | \$6,190    | 387                | \$5,395         | \$0            | \$126               | \$561                  | \$5,522    |
| 4           | 12                           | 178                | \$7,727         | \$0            | \$67                | \$1,147                | \$7,793    | 474                | \$6,325         | \$0            | \$331               | \$1,153                | \$6,657    |
| 4           | >12                          | 681                | \$8,280         | \$0            | \$163               | \$870                  | \$8,443    | 1,457              | \$6,919         | \$0            | \$186               | \$689                  | \$7,105    |
| 5           | 0                            | 80,836             | \$4,685         | \$512          | \$580               | \$577                  | \$5,777    | 38,978             | \$5,748         | \$1,089        | \$2,040             | \$838                  | \$8,878    |
| 5           | 1                            | 402,470            | \$3,610         | \$33           | \$246               | \$347                  | \$3,889    | 350,199            | \$3,384         | \$39           | \$413               | \$589                  | \$3,835    |
| 5           | 2                            | 343,281            | \$3,948         | \$24           | \$232               | \$371                  | \$4,204    | 341,853            | \$3,764         | \$24           | \$288               | \$579                  | \$4,076    |
| 5           | 3                            | 163,653            | \$4,300         | \$11           | \$263               | \$371                  | \$4,574    | 172,652            | \$4,137         | \$14           | \$280               | \$556                  | \$4,431    |
| 5           | 4                            | 64,217             | \$4,672         | \$18           | \$274               | \$468                  | \$4,964    | 71,369             | \$4,526         | \$19           | \$298               | \$549                  | \$4,843    |
| 5           | 5                            | 23,941             | \$5,053         | \$13           | \$313               | \$392                  | \$5,380    | 27,658             | \$4,852         | \$10           | \$387               | \$534                  | \$5,249    |
| 5           | 6                            | 9,274              | \$5,432         | \$12           | \$317               | \$890                  | \$5,760    | 11,133             | \$5,267         | \$13           | \$352               | \$569                  | \$5,633    |
| 5           | 7                            | 3,705              | \$5,891         | \$20           | \$376               | \$450                  | \$6,286    | 4,846              | \$5,501         | \$9            | \$481               | \$595                  | \$5,991    |
| 5           | 8                            | 1,734              | \$6,475         | \$11           | \$623               | \$579                  | \$7,109    | 2,167              | \$5,820         | \$138          | \$381               | \$621                  | \$6,339    |
| 5           | 9                            | 821                | \$6,827         | \$3            | \$325               | \$485                  | \$7,155    | 1,289              | \$6,115         | \$0            | \$383               | \$640                  | \$6,498    |
| 5           | 10                           | 497                | \$7,185         | \$37           | \$306               | \$837                  | \$7,528    | 748                | \$6,400         | \$0            | \$397               | \$714                  | \$6,797    |
| 5           | 11                           | 330                | \$7,699         | \$80           | \$346               | \$843                  | \$8,125    | 606                | \$6,668         | \$8            | \$392               | \$656                  | \$7,068    |
| 5           | 12                           | 292                | \$7,263         | \$22           | \$207               | \$988                  | \$7,492    | 685                | \$6,354         | \$14           | \$341               | \$726                  | \$6,709    |
| 5           | >12                          | 1,197              | \$9,529         | \$1            | \$227               | \$1,124                | \$9,757    | 2,155              | \$8,368         | \$0            | \$404               | \$1,095                | \$8,771    |
| 6           | 0                            | 64,233             | \$6,324         | \$1,150        | \$853               | \$800                  | \$8,328    | 32,341             | \$7,750         | \$1,780        | \$2,773             | \$1,115                | \$12,302   |
| 6           | 1                            | 338,200            | \$5,009         | \$108          | \$376               | \$541                  | \$5,492    | 269,474            | \$4,730         | \$122          | \$689               | \$817                  | \$5,541    |
| 6           | 2                            | 352,318            | \$5,236         | \$59           | \$343               | \$534                  | \$5,638    | 328,459            | \$5,020         | \$56           | \$467               | \$777                  | \$5,543    |
| 6           | 3                            | 198,671            | \$5,577         | \$36           | \$366               | \$535                  | \$5,979    | 200,117            | \$5,336         | \$52           | \$428               | \$717                  | \$5,816    |
| 6           | 4                            | 91,037             | \$5,935         | \$40           | \$406               | \$532                  | \$6,381    | 95,500             | \$5,685         | \$40           | \$457               | \$699                  | \$6,182    |
| 6           | 5                            | 38,422             | \$6,261         | \$21           | \$430               | \$524                  | \$6,712    | 42,262             | \$6,013         | \$33           | \$500               | \$690                  | \$6,546    |
| 6           | 6                            | 16,042             | \$6,627         | \$32           | \$459               | \$551                  | \$7,118    | 18,689             | \$6,342         | \$34           | \$537               | \$717                  | \$6,913    |
| 6           | 7                            | 6,828              | \$6,944         | \$44           | \$487               | \$576                  | \$7,475    | 8,530              | \$6,707         | \$90           | \$592               | \$753                  | \$7,390    |
| 6           | 8                            | 3,175              | \$7,471         | \$37           | \$434               | \$615                  | \$7,941    | 4,329              | \$6,923         | \$16           | \$648               | \$681                  | \$7,586    |
| 6           | 9                            | 1,582              | \$8,191         | \$2            | \$534               | \$894                  | \$8,727    | 2,285              | \$7,268         | \$13           | \$646               | \$753                  | \$7,927    |
| 6           | 10                           | 879                | \$8,151         | \$0            | \$527               | \$710                  | \$8,678    | 1,414              | \$7,549         | \$15           | \$649               | \$888                  | \$8,213    |
| 6           | 11                           | 552                | \$8,509         | \$29           | \$458               | \$996                  | \$8,995    | 1,014              | \$7,716         | \$39           | \$574               | \$891                  | \$8,329    |
| 6           | 12                           | 491                | \$9,741         | \$38           | \$701               | \$1,410                | \$10,480   | 958                | \$7,883         | \$45           | \$446               | \$1,091                | \$8,373    |
| 6           | >12                          | 2,022              | \$10,843        | \$6            | \$430               | \$1,495                | \$11,279   | 3,336              | \$9,705         | \$10           | \$339               | \$1,400                | \$10,054   |
| 7           | 0                            | 53,638             | \$8,381         | \$2,504        | \$1,628             | \$1,208                | \$12,513   | 31,067             | \$10,774        | \$3,075        | \$3,999             | \$1,421                | \$17,848   |
| 7           | 1                            | 274,120            | \$7,082         | \$319          | \$594               | \$868                  | \$7,995    | 204,194            | \$6,798         | \$382          | \$1,158             | \$1,233                | \$8,338    |
| 7           | 2                            | 337,871            | \$7,167         | \$172          | \$532               | \$787                  | \$7,871    | 300,034            | \$6,934         | \$186          | \$749               | \$1,074                | \$7,870    |
| 7           | 3                            | 226,929            | \$7,411         | \$136          | \$556               | \$744                  | \$8,103    | 218,473            | \$7,162         | \$145          | \$690               | \$993                  | \$7,997    |
| 7           | 4                            | 118,845            | \$7,707         | \$109          | \$598               | \$730                  | \$8,413    | 121,607            | \$7,462         | \$135          | \$703               | \$936                  | \$8,300    |
| 7           | 5                            | 56,169             | \$8,077         | \$93           | \$627               | \$737                  | \$8,797    | 60,747             | \$7,774         | \$124          | \$746               | \$934                  | \$8,644    |
| 7           | 6                            | 26,187             | \$8,351         | \$75           | \$678               | \$746                  | \$9,104    | 29,391             | \$8,045         | \$113          | \$796               | \$909                  | \$8,954    |
| 7           | 7                            | 12,424             | \$8,725         | \$67           | \$713               | \$763                  | \$9,505    | 14,368             | \$8,387         | \$71           | \$798               | \$905                  | \$9,256    |
| 7           | 8                            | 5,895              | \$9,091         | \$128          | \$751               | \$789                  | \$9,971    | 7,330              | \$8,554         | \$81           | \$879               | \$1,132                | \$9,514    |
| 7           | 9                            | 3,003              | \$9,588         | \$91           | \$737               | \$811                  | \$10,417   | 4,089              | \$8,872         | \$45           | \$887               | \$926                  | \$9,803    |
| 7           | 10                           | 1,742              | \$10,466        | \$36           | \$804               | \$929                  | \$11,306   | 2,429              | \$9,188         | \$98           | \$974               | \$1,310                | \$10,260   |
| 7           | 11                           | 1,055              | \$10,790        | \$26           | \$686               | \$1,158                | \$11,502   | 1,593              | \$9,829         | \$78           | \$775               | \$1,159                | \$10,682   |
| 7           | 12                           | 859                | \$11,219        | \$67           | \$596               | \$1,370                | \$11,882   | 1,390              | \$9,810         | \$91           | \$609               | \$1,272                | \$10,510   |
| 7           | >12                          | 3,237              | \$13,012        | \$55           | \$671               | \$1,618                | \$13,739   | 4,973              | \$11,696        | \$41           | \$669               | \$1,422                | \$12,405   |

**s-Table 4. Annual Average Patient Care Costs by Risk Decile, Number of PC Visits and Medicare Eligibility Age (Pooled FY2016-2019)**

| Risk Decile | Number of PC Visits (Annual) | Age <= 65          |                  |                |               |              |            | Age > 65           |                  |                |               |              |            |
|-------------|------------------------------|--------------------|------------------|----------------|---------------|--------------|------------|--------------------|------------------|----------------|---------------|--------------|------------|
|             |                              | Number of Patients | VA               | VA             | Commun        | Prescripti   | Total Cost | Number of Patients | VA               | VA             | Commun        | Prescripti   | Total Cost |
|             |                              |                    | Outpatie nt Cost | Inpatient Cost | ity Care Cost | on Drug Cost |            |                    | Outpatie nt Cost | Inpatient Cost | ity Care Cost | on Drug Cost |            |
| 8           | 0                            | 48,771             | \$12,109         | \$4,729        | \$2,290       | \$3,032      | \$19,128   | 35,504             | \$15,043         | \$4,902        | \$5,540       | \$1,935      | \$25,485   |
| 8           | 1                            | 211,832            | \$10,204         | \$1,047        | \$1,059       | \$1,508      | \$12,309   | 153,568            | \$9,829          | \$1,246        | \$2,123       | \$1,700      | \$13,198   |
| 8           | 2                            | 301,628            | \$10,210         | \$612          | \$885         | \$1,312      | \$11,707   | 261,974            | \$9,814          | \$661          | \$1,288       | \$1,470      | \$11,762   |
| 8           | 3                            | 237,764            | \$10,365         | \$457          | \$866         | \$1,172      | \$11,688   | 226,295            | \$10,009         | \$525          | \$1,154       | \$1,372      | \$11,688   |
| 8           | 4                            | 144,888            | \$10,603         | \$373          | \$886         | \$1,123      | \$11,862   | 145,863            | \$10,224         | \$437          | \$1,133       | \$1,306      | \$11,793   |
| 8           | 5                            | 78,487             | \$10,919         | \$333          | \$993         | \$1,106      | \$12,244   | 82,083             | \$10,432         | \$379          | \$1,199       | \$1,246      | \$12,010   |
| 8           | 6                            | 40,884             | \$11,198         | \$259          | \$987         | \$1,097      | \$12,444   | 44,031             | \$10,718         | \$339          | \$1,210       | \$1,242      | \$12,266   |
| 8           | 7                            | 20,439             | \$11,708         | \$262          | \$1,113       | \$1,126      | \$13,084   | 23,418             | \$10,994         | \$354          | \$1,302       | \$1,258      | \$12,650   |
| 8           | 8                            | 10,800             | \$12,109         | \$188          | \$1,182       | \$1,139      | \$13,478   | 12,751             | \$11,415         | \$293          | \$1,259       | \$1,282      | \$12,967   |
| 8           | 9                            | 5,817              | \$12,603         | \$276          | \$1,215       | \$1,255      | \$14,094   | 7,164              | \$11,670         | \$301          | \$1,411       | \$1,297      | \$13,382   |
| 8           | 10                           | 3,405              | \$12,877         | \$251          | \$1,184       | \$1,174      | \$14,312   | 4,268              | \$11,830         | \$240          | \$1,389       | \$1,292      | \$13,458   |
| 8           | 11                           | 2,074              | \$13,093         | \$306          | \$1,349       | \$1,279      | \$14,748   | 2,929              | \$11,980         | \$416          | \$1,146       | \$1,298      | \$13,542   |
| 8           | 12                           | 1,527              | \$13,878         | \$220          | \$1,211       | \$1,516      | \$15,310   | 2,267              | \$12,752         | \$277          | \$1,224       | \$1,471      | \$14,253   |
| 8           | >12                          | 5,467              | \$15,985         | \$166          | \$887         | \$1,875      | \$17,038   | 7,800              | \$14,693         | \$191          | \$1,101       | \$2,023      | \$15,985   |
| 9           | 0                            | 50,479             | \$16,998         | \$10,673       | \$3,650       | \$4,978      | \$31,321   | 50,906             | \$20,924         | \$9,038        | \$7,222       | \$2,702      | \$37,184   |
| 9           | 1                            | 154,370            | \$15,269         | \$4,108        | \$2,175       | \$2,721      | \$21,552   | 112,886            | \$15,135         | \$4,684        | \$4,276       | \$2,670      | \$24,096   |
| 9           | 2                            | 243,242            | \$15,488         | \$2,546        | \$1,751       | \$2,350      | \$19,785   | 213,117            | \$14,905         | \$2,840        | \$2,651       | \$2,342      | \$20,395   |
| 9           | 3                            | 225,179            | \$15,638         | \$1,992        | \$1,673       | \$2,090      | \$19,302   | 218,028            | \$14,983         | \$2,251        | \$2,244       | \$2,092      | \$19,478   |
| 9           | 4                            | 162,809            | \$15,930         | \$1,653        | \$1,645       | \$1,934      | \$19,227   | 165,962            | \$15,152         | \$1,963        | \$2,182       | \$1,967      | \$19,296   |
| 9           | 5                            | 101,455            | \$16,237         | \$1,398        | \$1,672       | \$1,837      | \$19,307   | 106,648            | \$15,362         | \$1,717        | \$2,162       | \$1,877      | \$19,240   |
| 9           | 6                            | 59,831             | \$16,597         | \$1,262        | \$1,752       | \$1,790      | \$19,610   | 64,594             | \$15,648         | \$1,480        | \$2,238       | \$1,806      | \$19,366   |
| 9           | 7                            | 34,382             | \$16,860         | \$1,161        | \$1,827       | \$1,749      | \$19,849   | 37,976             | \$15,912         | \$1,343        | \$2,279       | \$1,790      | \$19,533   |
| 9           | 8                            | 19,426             | \$17,544         | \$1,085        | \$1,832       | \$1,797      | \$20,461   | 22,248             | \$16,253         | \$1,330        | \$2,236       | \$1,771      | \$19,819   |
| 9           | 9                            | 11,472             | \$17,886         | \$1,046        | \$1,897       | \$1,834      | \$20,830   | 13,315             | \$16,458         | \$1,132        | \$2,368       | \$1,797      | \$19,959   |
| 9           | 10                           | 6,830              | \$17,972         | \$823          | \$1,859       | \$1,712      | \$20,654   | 8,322              | \$16,747         | \$1,153        | \$2,340       | \$1,731      | \$20,239   |
| 9           | 11                           | 4,306              | \$18,568         | \$1,044        | \$2,076       | \$1,838      | \$21,688   | 5,393              | \$17,084         | \$1,061        | \$2,508       | \$1,807      | \$20,652   |
| 9           | 12                           | 2,922              | \$19,389         | \$1,277        | \$2,009       | \$2,025      | \$22,675   | 3,882              | \$17,375         | \$1,197        | \$2,316       | \$1,877      | \$20,888   |
| 9           | >12                          | 9,753              | \$21,436         | \$1,054        | \$1,731       | \$2,370      | \$24,221   | 12,953             | \$19,769         | \$847          | \$2,074       | \$2,334      | \$22,689   |
| 10          | 0                            | 63,515             | \$29,628         | \$45,532       | \$11,567      | \$7,986      | \$86,726   | 89,692             | \$32,955         | \$38,167       | \$13,841      | \$5,074      | \$84,964   |
| 10          | 1                            | 105,394            | \$26,287         | \$31,246       | \$7,860       | \$5,536      | \$65,393   | 97,980             | \$26,924         | \$34,775       | \$11,779      | \$5,522      | \$73,478   |
| 10          | 2                            | 158,899            | \$27,324         | \$22,984       | \$6,464       | \$5,130      | \$56,773   | 156,824            | \$27,181         | \$25,344       | \$8,756       | \$5,142      | \$61,281   |
| 10          | 3                            | 168,840            | \$28,399         | \$19,593       | \$6,096       | \$4,867      | \$54,088   | 182,131            | \$27,891         | \$21,499       | \$7,623       | \$4,890      | \$57,013   |
| 10          | 4                            | 145,419            | \$29,375         | \$17,999       | \$6,024       | \$4,583      | \$53,398   | 164,556            | \$28,552         | \$19,873       | \$7,147       | \$4,590      | \$55,572   |
| 10          | 5                            | 110,566            | \$30,657         | \$17,228       | \$6,054       | \$4,530      | \$53,939   | 128,432            | \$29,378         | \$19,299       | \$7,249       | \$4,449      | \$55,926   |
| 10          | 6                            | 78,396             | \$31,658         | \$16,763       | \$6,310       | \$4,419      | \$54,731   | 91,934             | \$30,432         | \$19,329       | \$7,361       | \$4,384      | \$57,121   |
| 10          | 7                            | 53,141             | \$32,794         | \$17,152       | \$6,433       | \$4,384      | \$56,378   | 62,894             | \$31,566         | \$19,186       | \$7,515       | \$4,421      | \$58,267   |
| 10          | 8                            | 36,163             | \$34,237         | \$17,327       | \$6,733       | \$4,476      | \$58,297   | 42,193             | \$32,455         | \$19,327       | \$7,604       | \$4,450      | \$59,386   |
| 10          | 9                            | 24,274             | \$35,515         | \$17,557       | \$6,976       | \$4,495      | \$60,048   | 28,125             | \$33,253         | \$18,827       | \$7,893       | \$4,339      | \$59,973   |
| 10          | 10                           | 16,550             | \$36,627         | \$17,786       | \$6,921       | \$4,353      | \$61,335   | 19,096             | \$34,254         | \$19,020       | \$8,212       | \$4,635      | \$61,486   |
| 10          | 11                           | 11,229             | \$38,218         | \$19,005       | \$7,295       | \$4,717      | \$64,518   | 13,068             | \$35,070         | \$19,174       | \$8,265       | \$4,405      | \$62,509   |
| 10          | 12                           | 8,037              | \$39,399         | \$19,037       | \$7,238       | \$4,663      | \$65,674   | 9,430              | \$35,665         | \$19,682       | \$8,380       | \$4,553      | \$63,727   |
| 10          | >12                          | 25,735             | \$43,845         | \$19,510       | \$7,114       | \$5,377      | \$70,469   | 30,165             | \$39,040         | \$17,930       | \$8,050       | \$4,952      | \$65,020   |



**s-Table 5. Multivariate Linear Model Estimate of PC Visit Effect on Total Patient Care Cost (by Medicare Eligible Age; Pooled Data: FY2016-2019)**

| Variable                                      | Age <= 65 (N=10,631,768) |          |         | Age > 65 (N=10,599,496) |          |         |
|-----------------------------------------------|--------------------------|----------|---------|-------------------------|----------|---------|
|                                               | Parameter                | Standard | Pr >  t | Parameter               | Standard | Pr >  t |
|                                               | Estimate                 | Error    |         | Estimate                | Error    |         |
| <b>Intercept</b>                              | -23,475.00               | 61.56    | <.0001  | -22,124.00              | 115.01   | <.0001  |
| <b>Number of PC Visits (in person)</b>        | -630.23                  | 2.59     | <.0001  | -798.03                 | 2.72     | <.0001  |
| <b>Number of PC Visits (telehealth)</b>       | -283.65                  | 9.50     | <.0001  | -321.79                 | 12.69    | <.0001  |
| <b>Number of PC Visits (phone)</b>            | -78.73                   | 2.53     | <.0001  | -78.10                  | 2.34     | <.0001  |
| <b>Age</b>                                    | -40.82                   | 0.63     | <.0001  | -16.70                  | 1.36     | <.0001  |
| <b>Age &gt;= 35 and &lt; 45</b>               | -30.67                   | 15.76    | 0.0516  |                         |          |         |
| <b>Age &gt;= 45 and &lt; 55</b>               | 358.27                   | 16.30    | <.0001  |                         |          |         |
| <b>Age &gt;= 55 and &lt; 65</b>               | 488.74                   | 18.99    | <.0001  |                         |          |         |
| <b>Age &gt;= 75</b>                           |                          |          |         | 661.27                  | 20.54    | <.0001  |
| <b>Gender (Female)</b>                        | -699.86                  | 13.79    | <.0001  | 195.09                  | 38.72    | <.0001  |
| <b>Marital Status (Married)</b>               | -329.54                  | 10.06    | <.0001  | -1,033.47               | 11.45    | <.0001  |
| <b>Racial Status (White)</b>                  | -277.59                  | 13.59    | <.0001  | -1,240.31               | 16.29    | <.0001  |
| <b>Racial Status (Black)</b>                  | -794.28                  | 16.37    | <.0001  | -1,029.64               | 23.98    | <.0001  |
| <b>Enrolled in Medicare</b>                   | 528.56                   | 17.09    | <.0001  | 116.15                  | 15.26    | <.0001  |
| <b>Enrolled in Medicaid</b>                   | 123.85                   | 32.98    | 0.0002  | 1,310.13                | 126.13   | <.0001  |
| <b>Covered by Private Insurance</b>           | -1,590.65                | 12.06    | <.0001  | -1,576.74               | 33.34    | <.0001  |
| <b>Disability Rating (%)</b>                  | -15.03                   | 0.26     | <.0001  | -6.02                   | 0.33     | <.0001  |
| <b>Disability Rating 70%+ (% of patients)</b> | 10.29                    | 21.20    | 0.6274  | 384.42                  | 28.62    | <.0001  |
| <b>Drive Time to Closest VHA PCP (Min)</b>    | -0.17                    | 0.32     | 0.6046  | -5.84                   | 0.32     | <.0001  |
| <b>CPM Risk Score</b>                         | 393.62                   | 0.11     | <.0001  | 391.74                  | 0.11     | <.0001  |
| <b>FY17</b>                                   | 110.81                   | 13.55    | <.0001  | 61.65                   | 15.22    | <.0001  |
| <b>FY18</b>                                   | 708.97                   | 13.52    | <.0001  | 734.91                  | 15.24    | <.0001  |
| <b>FY19</b>                                   | 1,180.44                 | 13.59    | <.0001  | 1,301.27                | 15.48    | <.0001  |

Notes: The fixed effects of the 140 hospitals are not shown here. Age < 35 (left panel), 65 < age < 75 (right panel), racial status (other), and FY2016 were used as reference groups.

**s-Table 6. Multivariate Linear Model Estimate of PC Visit Effect on Total Patient Care Cost Including Medicare Expenditure (Pooled data: FY2016-2019; N = 21,231,264)**

| Variable                                      | Parameter Estimate | Standard Error | Pr >  t |
|-----------------------------------------------|--------------------|----------------|---------|
| <b>Intercept</b>                              | -25,072.00         | 69.43          | <.0001  |
| <b>Number of PC Visits (in person)</b>        | -1,157.17          | 2.55           | <.0001  |
| <b>Number of PC Visits (telehealth)</b>       | -400.94            | 10.49          | <.0001  |
| <b>Number of PC Visits (phone)</b>            | 134.50             | 2.33           | <.0001  |
| <b>Age</b>                                    | 78.09              | 1.28           | <.0001  |
| <b>Age &gt;= 35 and &lt; 45</b>               | -962.35            | 27.29          | <.0001  |
| <b>Age &gt;= 45 and &lt; 55</b>               | -1,258.69          | 34.59          | <.0001  |
| <b>Age &gt;= 55 and &lt; 65</b>               | -1,365.09          | 44.54          | <.0001  |
| <b>Age &gt;= 65 and &lt; 75</b>               | 14.60              | 55.24          | 0.79    |
| <b>Age &gt;= 75</b>                           | 3,621.74           | 71.59          | <.0001  |
| <b>Gender (Female)</b>                        | -682.12            | 18.36          | <.0001  |
| <b>Marital Status (Married)</b>               | -431.10            | 10.31          | <.0001  |
| <b>Racial Status (White)</b>                  | -5,006.90          | 14.20          | <.0001  |
| <b>Racial Status (Black)</b>                  | -5,365.87          | 18.49          | <.0001  |
| <b>Enrolled in Medicare</b>                   | 2,136.97           | 14.84          | <.0001  |
| <b>Enrolled in Medicaid</b>                   | 455.87             | 45.28          | <.0001  |
| <b>Covered by Private Insurance</b>           | -1,744.42          | 16.00          | <.0001  |
| <b>Disability Rating (%)</b>                  | -0.65              | 0.28           | 0.02    |
| <b>Disability Rating 70%+ (% of patients)</b> | 113.47             | 23.51          | <.0001  |
| <b>Drive Time to Closest VHA PCP (Min)</b>    | -1.24              | 0.31           | <.0001  |
| <b>CPM Risk Score</b>                         | 413.78             | 0.11           | <.0001  |
| <b>FY17</b>                                   | 239.75             | 13.84          | <.0001  |
| <b>FY18</b>                                   | 1,133.12           | 13.82          | <.0001  |
| <b>FY19</b>                                   | 1,964.36           | 13.94          | <.0001  |

Notes: The fixed effects of the 140 hospitals are not shown here. Age < 35, racial status (other), and FY2016 were used as reference groups.

**s-Table 7. Multivariate Linear Model Estimate of PC Visit Effect on Total Patient Care Cost Including Medicare Expenditure (by Fiscal Year: 2016-2019)**

| Variable                                      | FY2016 (N=5,186,112) |         | FY2017 (N=5,261,550) |         | FY2018 (N=5,373,568) |         | FY2019 (N=5,410,034) |         |
|-----------------------------------------------|----------------------|---------|----------------------|---------|----------------------|---------|----------------------|---------|
|                                               | Parameter Estimate   | Pr >  t |
| <b>Intercept</b>                              | -21,573.00           | <.0001  | -22,923.00           | <.0001  | -24,543.00           | <.0001  | -30,006.00           | <.0001  |
| <b>Number of PC Visits (in person)</b>        | -1,023.05            | <.0001  | -1,034.18            | <.0001  | -1,163.05            | <.0001  | -1,348.85            | <.0001  |
| <b>Number of PC Visits (telehealth)</b>       | -477.36              | <.0001  | -322.84              | <.0001  | -349.86              | <.0001  | -486.63              | <.0001  |
| <b>Number of PC Visits (phone)</b>            | 97.26                | <.0001  | 158.08               | <.0001  | 141.32               | <.0001  | 151.49               | <.0001  |
| <b>Age</b>                                    | 29.83                | <.0001  | 73.64                | <.0001  | 85.05                | <.0001  | 93.14                | <.0001  |
| <b>Age &gt;= 35 and &lt; 45</b>               | -78.88               | 0.1593  | -683.29              | <.0001  | -1,119.19            | <.0001  | -1,456.25            | <.0001  |
| <b>Age &gt;= 45 and &lt; 55</b>               | 165.44               | 0.0173  | -854.20              | <.0001  | -1,476.19            | <.0001  | -2,039.26            | <.0001  |
| <b>Age &gt;= 55 and &lt; 65</b>               | 577.67               | <.0001  | -907.19              | <.0001  | -1,634.65            | <.0001  | -2,394.29            | <.0001  |
| <b>Age &gt;= 65 and &lt; 75</b>               | 1,950.60             | <.0001  | 255.69               | 0.0217  | -33.65               | 0.7611  | -1,068.10            | <.0001  |
| <b>Age &gt;= 75</b>                           | 5,412.37             | <.0001  | 3,544.40             | <.0001  | 3,748.43             | <.0001  | 2,774.75             | <.0001  |
| <b>Gender (Female)</b>                        | -469.64              | <.0001  | -574.16              | <.0001  | -754.21              | <.0001  | -852.58              | <.0001  |
| <b>Marital Status (Married)</b>               | -367.19              | <.0001  | -380.35              | <.0001  | -463.99              | <.0001  | -461.64              | <.0001  |
| <b>Racial Status (White)</b>                  | -6,370.99            | <.0001  | -6,345.17            | <.0001  | -5,228.62            | <.0001  | 672.30               | <.0001  |
| <b>Racial Status (Black)</b>                  | -6,730.65            | <.0001  | -6,629.08            | <.0001  | -5,493.35            | <.0001  | 29.78                | 0.5162  |
| <b>Enrolled in Medicare</b>                   | 2,488.77             | <.0001  | 2,405.83             | <.0001  | 1,773.28             | <.0001  | 1,858.67             | <.0001  |
| <b>Enrolled in Medicaid</b>                   | 431.50               | <.0001  | 766.44               | <.0001  | 250.63               | 0.0068  | 358.89               | 0.0001  |
| <b>Covered by Private Insurance</b>           | -1,556.88            | <.0001  | -1,675.44            | <.0001  | -1,909.81            | <.0001  | -1,848.67            | <.0001  |
| <b>Disability Rating (%)</b>                  | 1.67                 | 0.003   | 0.49                 | 0.3787  | -0.71                | 0.2044  | -1.06                | 0.0633  |
| <b>Disability Rating 70%+ (% of patients)</b> | 73.45                | 0.1242  | 52.50                | 0.2574  | 120.14               | 0.0101  | 130.86               | 0.0054  |
| <b>Drive Time to Closest VHA PCP (Min)</b>    | -1.35                | 0.0251  | -1.54                | 0.0131  | -0.39                | 0.5312  | -2.41                | 0.0001  |
| <b>CPM Risk Score</b>                         | 395.67               | <.0001  | 400.28               | <.0001  | 421.32               | <.0001  | 435.76               | <.0001  |

Notes: The fixed effects of the 140 hospitals are not shown here. Age < 35, and racial status (other) were used as reference groups.

**s-Table 8. Random Effect Model Estimates of PC Visit Effect on Total Patient Care Cost (FY 2019)**

| Effect                                        | Parameter  | Standard | t Value | Pr >  t |
|-----------------------------------------------|------------|----------|---------|---------|
|                                               | Estimate   | Error    |         |         |
| <b>Intercept</b>                              | -24,505.00 | 65.33    | -375.07 | <.0001  |
| <b>Number of PC Visits (in person)</b>        | -783.21    | 3.78     | -207.45 | <.0001  |
| <b>Number of PC Visits (telehealth)</b>       | -369.78    | 13.39    | -27.62  | <.0001  |
| <b>Number of PC Visits (phone)</b>            | -105.30    | 3.48     | -30.26  | <.0001  |
| <b>Age</b>                                    | -52.92     | 1.85     | -28.66  | <.0001  |
| <b>Age &gt;= 35 and &lt; 45</b>               | 231.83     | 39.70    | 5.84    | <.0001  |
| <b>Age &gt;= 45 and &lt; 55</b>               | 809.60     | 50.88    | 15.91   | <.0001  |
| <b>Age &gt;= 55 and &lt; 65</b>               | 1,215.56   | 65.13    | 18.66   | <.0001  |
| <b>Age &gt;= 65 and &lt; 75</b>               | 1,772.89   | 81.46    | 21.76   | <.0001  |
| <b>Age &gt;= 75</b>                           | 2,886.56   | 103.89   | 27.78   | <.0001  |
| <b>Gender (Female)</b>                        | -721.13    | 26.54    | -27.18  | <.0001  |
| <b>Marital Status (Married)</b>               | -871.18    | 15.33    | -56.84  | <.0001  |
| <b>Racial Status (White)</b>                  | -39.77     | 28.27    | -1.41   | 0.1596  |
| <b>Racial Status (Black)</b>                  | -230.50    | 31.84    | -7.24   | <.0001  |
| <b>Enrolled in Medicare</b>                   | 73.81      | 22.45    | 3.29    | 0.001   |
| <b>Enrolled in Medicaid</b>                   | 774.12     | 68.31    | 11.33   | <.0001  |
| <b>Covered by Private Insurance</b>           | -1,538.56  | 23.87    | -64.45  | <.0001  |
| <b>Disability Rating (%)</b>                  | -7.94      | 0.42     | -19.09  | <.0001  |
| <b>Disability Rating 70%+ (% of patients)</b> | 152.77     | 34.51    | 4.43    | <.0001  |
| <b>Drive Time to Closest VHA PCP (Min)</b>    | -6.46      | 0.44     | -14.57  | <.0001  |
| <b>Health Risk Score</b>                      | 411.18     | 0.16     | 2568.85 | <.0001  |
